# Supplementary material for: CD4+ and γδ T Cells are the main Producers of IL-22 and IL-17A in Lymphocytes from Mycobacterium bovis-infected Cattle
Source: PubMed Central journal article supplement (PMC4947955; doi:10.1038/srep29990), 2016-07-18
Supplement: srep29990-s1.pdf [file srep29990-s1.pdf]

# Supplementary Information

**Manuscript:** CD4<sup>+</sup> and  $\gamma\delta$  T Cells are the main Producers of IL-22 and IL-17A in Lymphocytes from *Mycobacterium bovis*-infected Cattle.

**Authors and Affiliation:** Sabine Steinbach, H. Martin Vordermeier, Gareth J. Jones\*  
*TB Immunology and Vaccinology, Department of Bacteriology, Animal and Plant Health Agency, New Haw, Addlestone, Surrey, KT15 3NB, United Kingdom*

Supplemental figure S1.

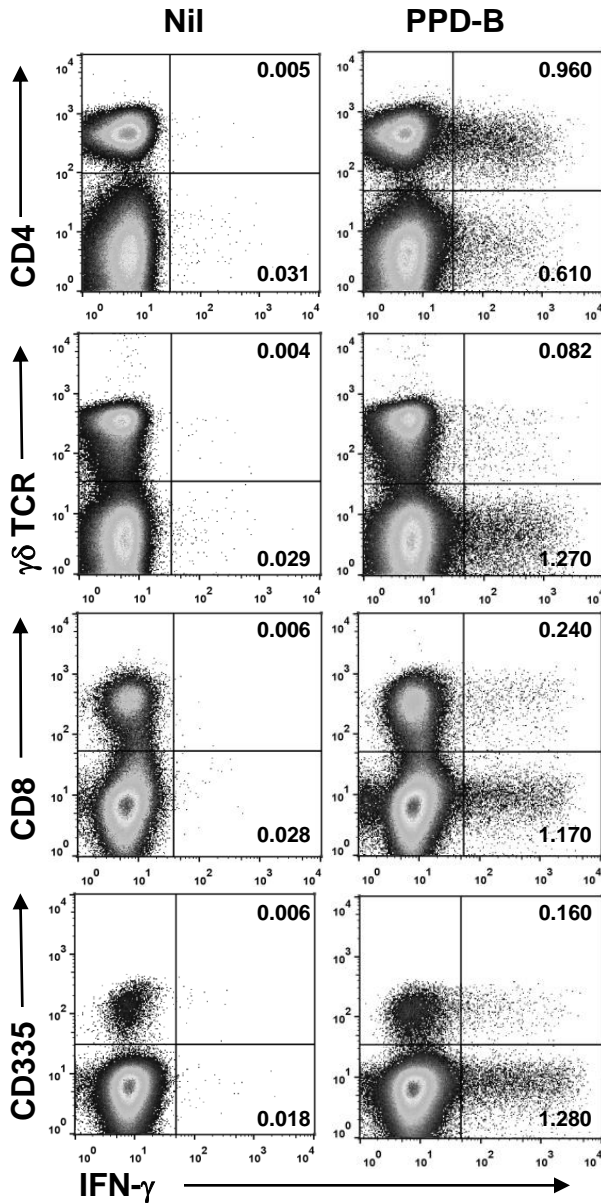

**Supplemental figure S1. *M. bovis* specific induction of IFN- $\gamma$  production in multiple cell populations.** PBMC from a TB-reactor animal were stimulated with PPD-B and flow cytometry analysis performed to enumerate IFN- $\gamma$  production in different lymphocyte populations. Numbers represent the percentage of single, live bovine lymphocytes.

Supplemental figure S2.

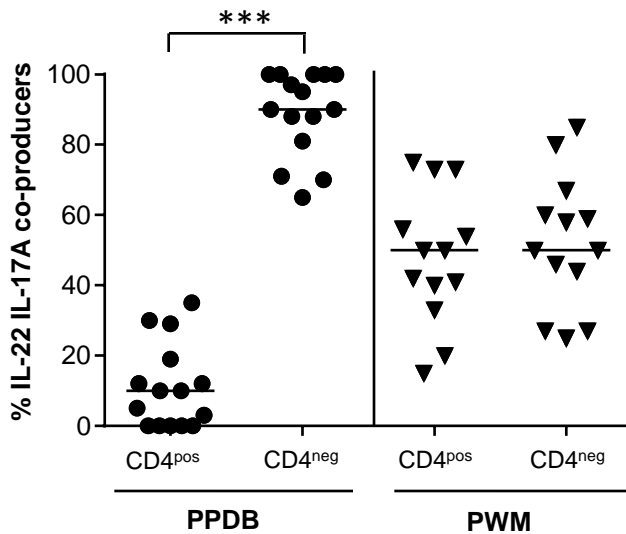

**Supplemental figure S2. *M. bovis* antigens induce IL-22 / IL-17A co-producers mainly in the CD4<sup>neg</sup> lymphocyte compartment.** PBMC from a TB-reactor animal were stimulated with PPDB or PWM and flow cytometry analysis performed to enumerate simultaneous production of IL-22 and IL-17A in CD4<sup>pos</sup> and CD4<sup>neg</sup> lymphocyte compartments. The results are presented as the relative proportion of IL-22 IL-17A co-producers that label with or without CD4. Each symbol represents an individual animal while horizontal lines represent the median value. \*\*\*  $p < 0.001$ , Paired Students T test.
